# Supplementary material for: Chemo-enzymatic access toC-4′-hydroxyl-tetrahydrofurano-spironucleosides
Source: Royal Society of Chemistry journal article supplement (doi:10.1039/d0nj03253k), 2020-12-10
Supplement: d0nj03253k1.pdf [file d0nj03253k1.pdf]

## Supporting Information

|                                                                                                                      |     |
|----------------------------------------------------------------------------------------------------------------------|-----|
| <sup>1</sup> H- and <sup>13</sup> C NMR Spectra of compound <b>8a</b> .....                                          | S2  |
| <sup>1</sup> H- <sup>1</sup> H COSY and <sup>1</sup> H- <sup>13</sup> C HMQC NMR Spectra of compound <b>8a</b> ..... | S3  |
| <sup>1</sup> H- and <sup>13</sup> C NMR Spectra of compound <b>8b</b> .....                                          | S4  |
| <sup>1</sup> H- and <sup>13</sup> C NMR Spectra of compound <b>8c</b> .....                                          | S5  |
| <sup>1</sup> H- and <sup>13</sup> C NMR Spectra of compound <b>9</b> .....                                           | S6  |
| <sup>1</sup> H- and <sup>13</sup> C NMR Spectra of compound <b>10</b> .....                                          | S7  |
| <sup>1</sup> H- and <sup>13</sup> C NMR Spectra of compound <b>11</b> .....                                          | S8  |
| <sup>1</sup> H- and <sup>13</sup> C NMR Spectra of compound <b>12a-b</b> .....                                       | S9  |
| <sup>1</sup> H- and <sup>13</sup> C NMR Spectra of compound <b>13a</b> .....                                         | S10 |
| <sup>1</sup> H- and <sup>13</sup> C NMR Spectra of compound <b>13b</b> .....                                         | S11 |
| <sup>1</sup> H- and <sup>13</sup> C NMR Spectra of compound <b>13c</b> .....                                         | S12 |
| <sup>1</sup> H- <sup>13</sup> C HMQC NMR Spectrum of compound <b>13c</b> .....                                       | S13 |
| <sup>1</sup> H- and <sup>13</sup> C NMR Spectra of compound <b>13d</b> .....                                         | S14 |
| <sup>1</sup> H- and <sup>13</sup> C NMR Spectra of compound <b>5a</b> .....                                          | S15 |
| <sup>1</sup> H- and <sup>13</sup> C NMR Spectra of compound <b>5b</b> .....                                          | S16 |
| <sup>1</sup> H- and <sup>13</sup> C NMR Spectra of compound <b>5c</b> .....                                          | S17 |
| <sup>1</sup> H- and <sup>13</sup> C NMR Spectra of compound <b>5d</b> .....                                          | S18 |
| <sup>1</sup> H- <sup>1</sup> H COSY and <sup>1</sup> H- <sup>13</sup> C HMQC NMR Spectra of compound <b>5d</b> ..... | S19 |
| X-Ray diffraction studies on compound <b>5c</b> .....                                                                | S20 |

# <sup>1</sup>H- and <sup>13</sup>C NMR Spectra of compound 8a (400 MHz and 100.6 MHz, DMSO-d<sub>6</sub>)

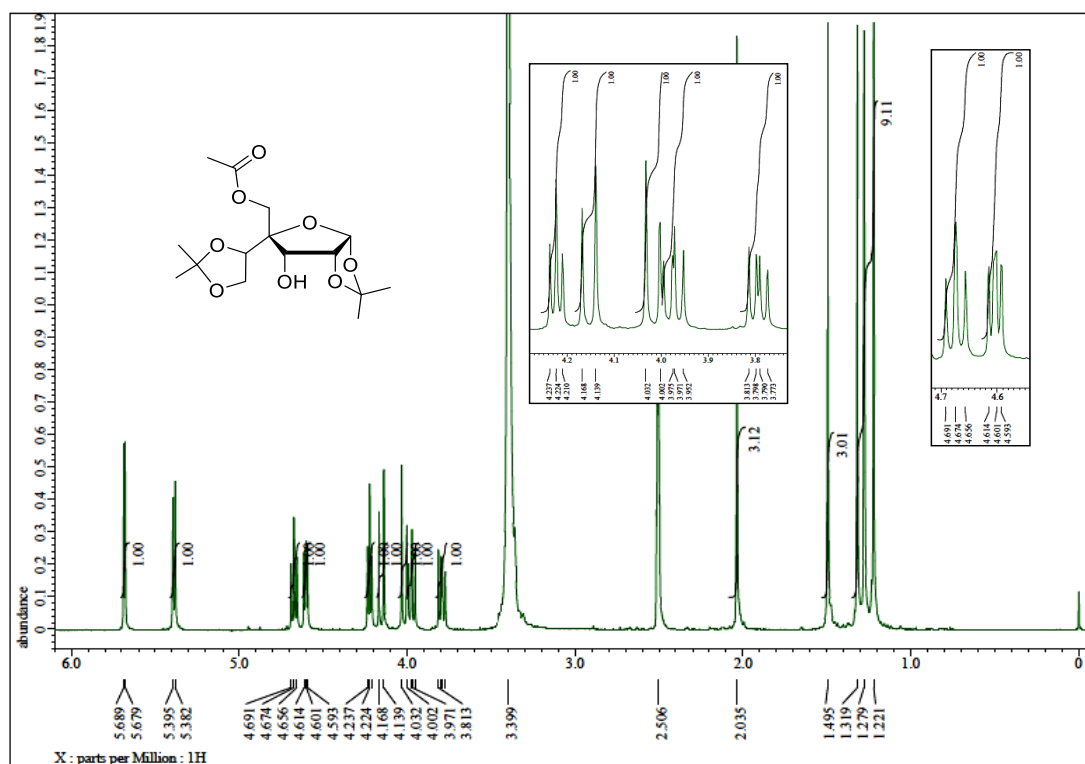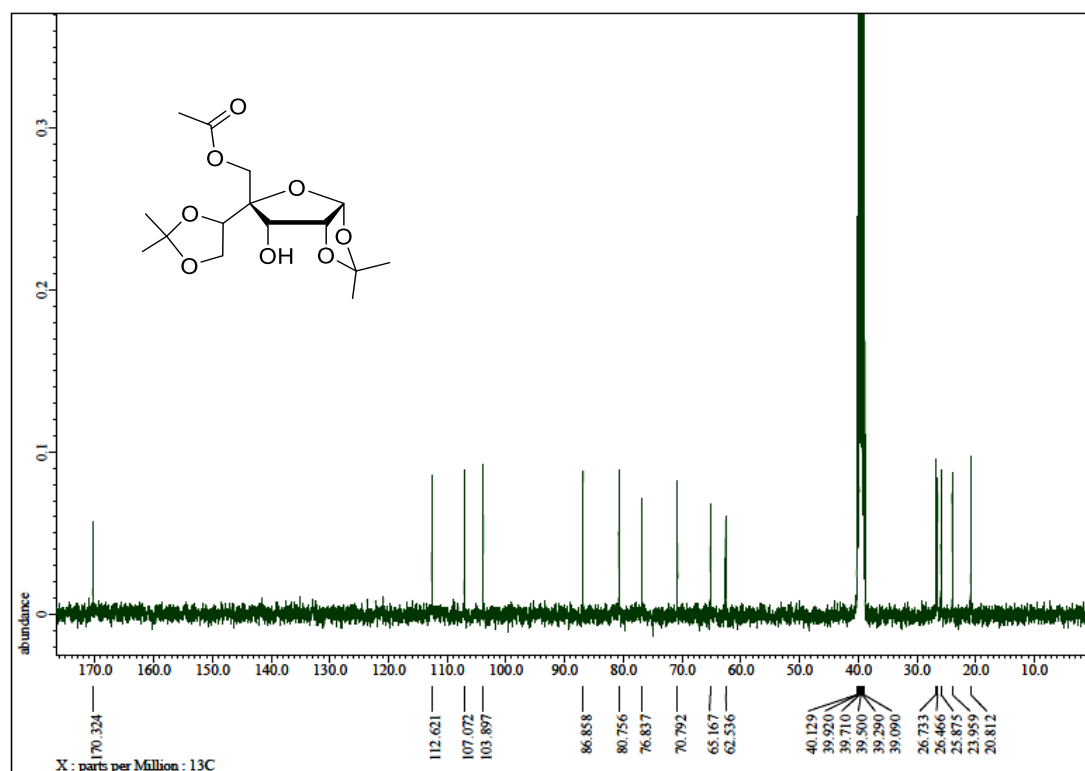

$^1\text{H}$ - $^1\text{H}$  COSY and  $^1\text{H}$ - $^{13}\text{C}$  HMQC NMR Spectra of compound 8a (400 MHz, DMSO- $d_6$ )

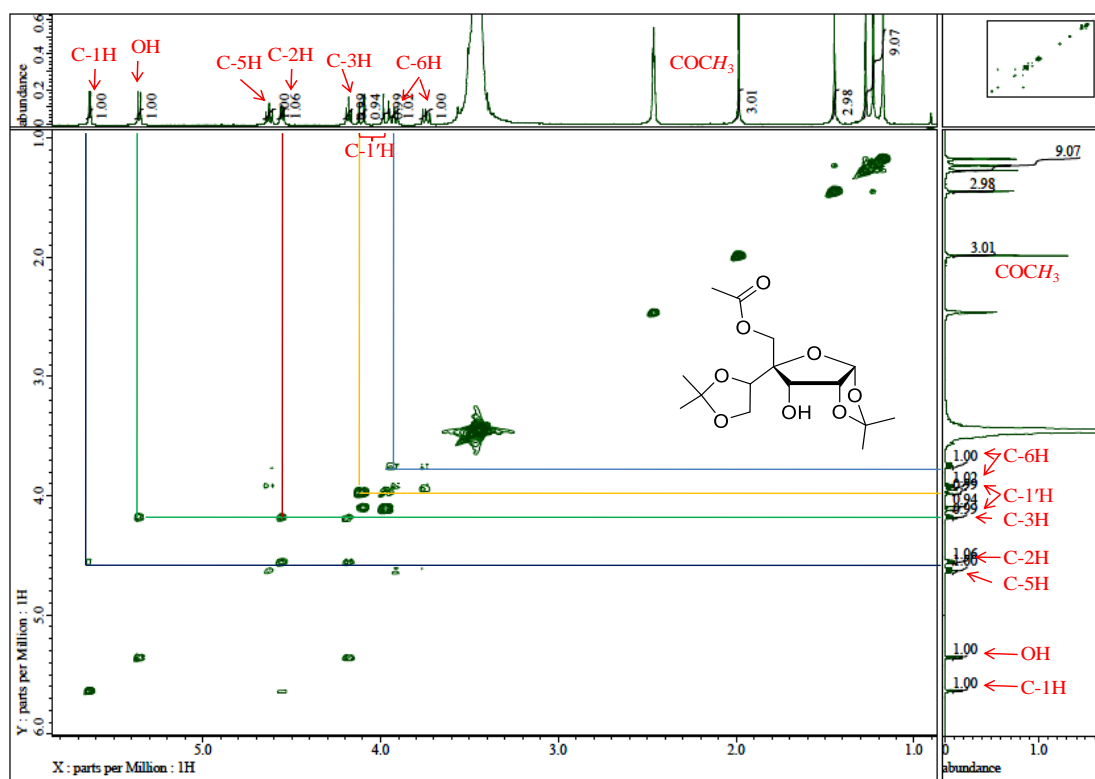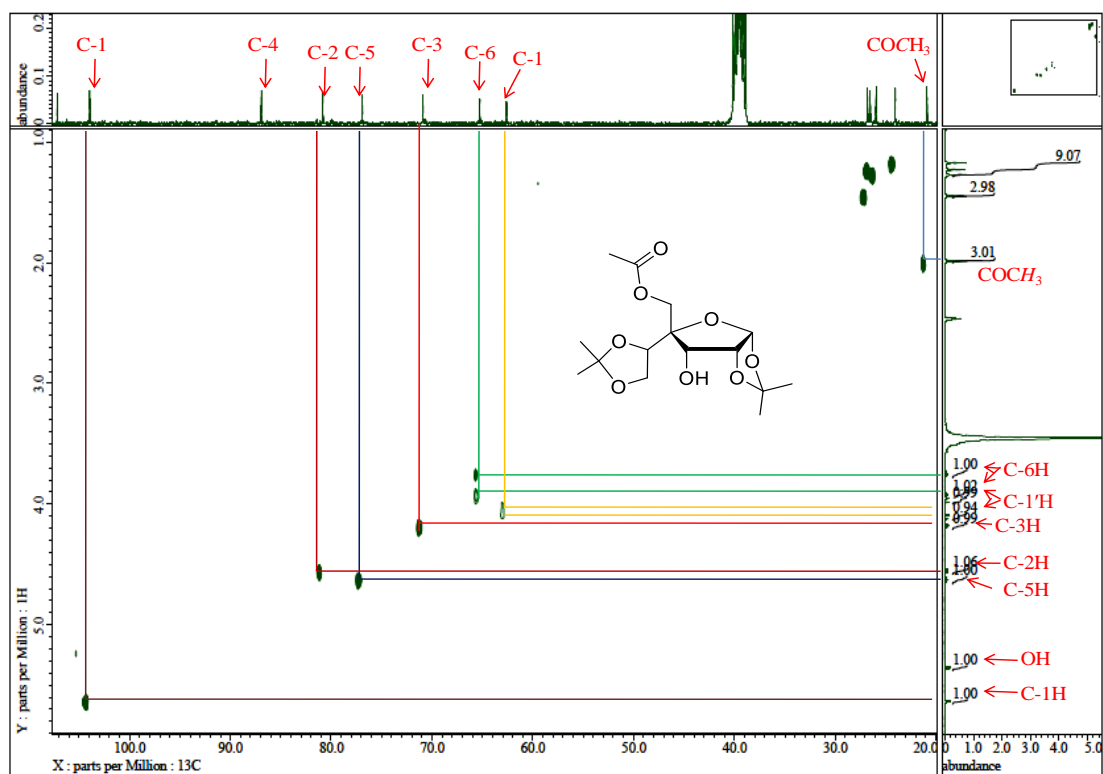

# <sup>1</sup>H- and <sup>13</sup>C NMR Spectra of compound 8b (400 MHz and 100.6 MHz, CDCl<sub>3</sub>)

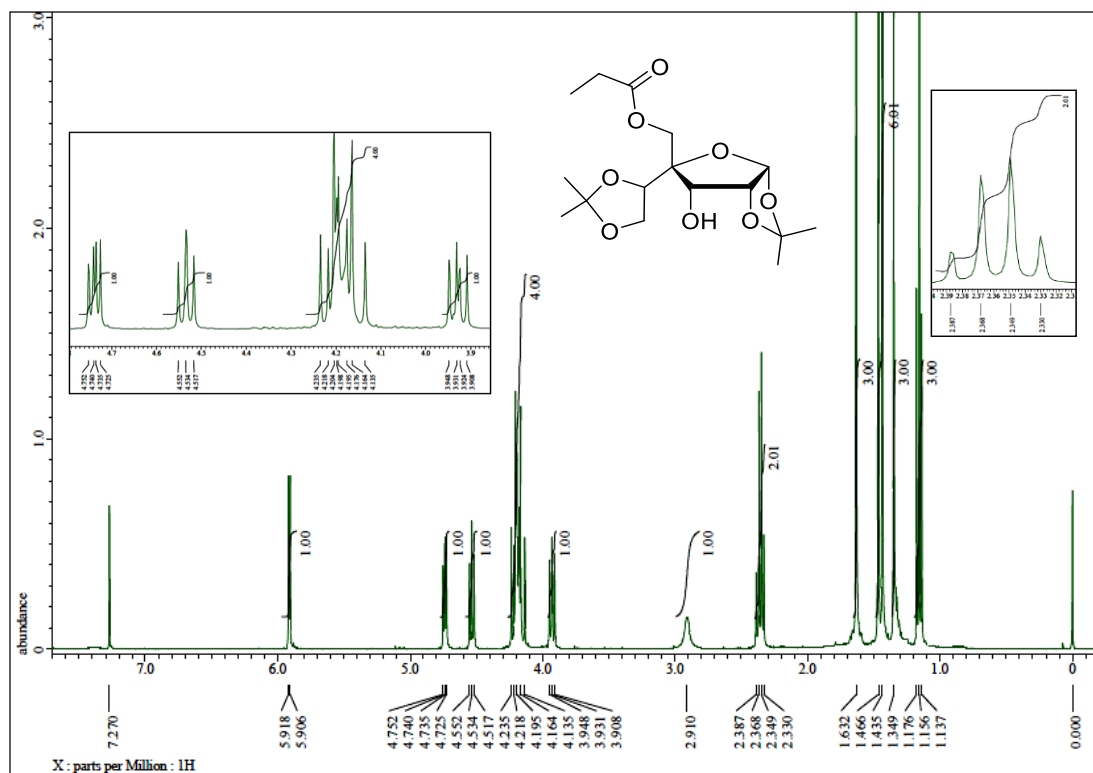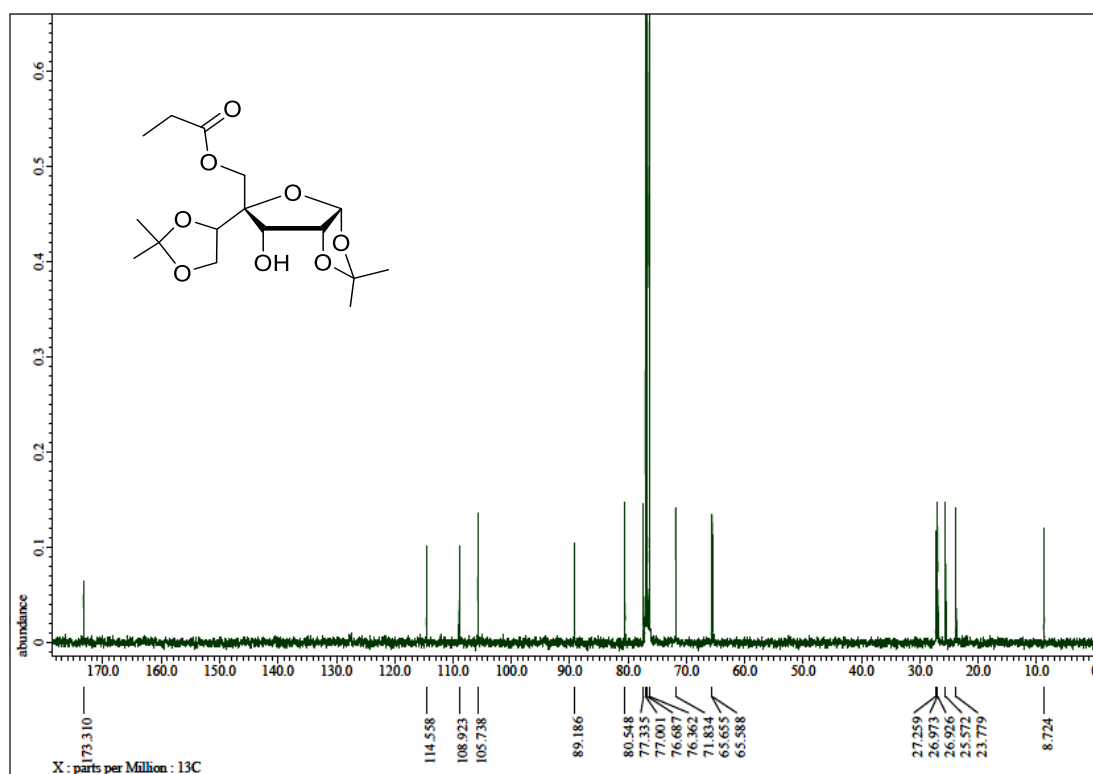

<sup>1</sup>H- and <sup>13</sup>C NMR Spectra of compound 8c (400 MHz and 100.6 MHz, CDCl<sub>3</sub>)

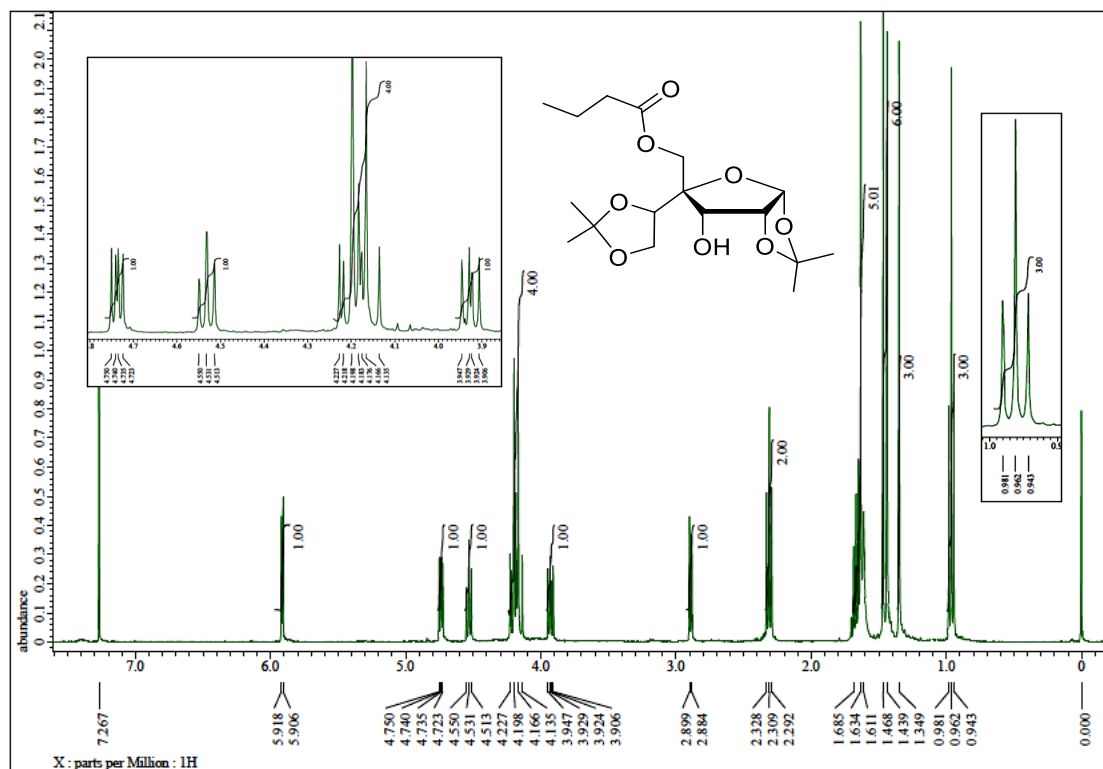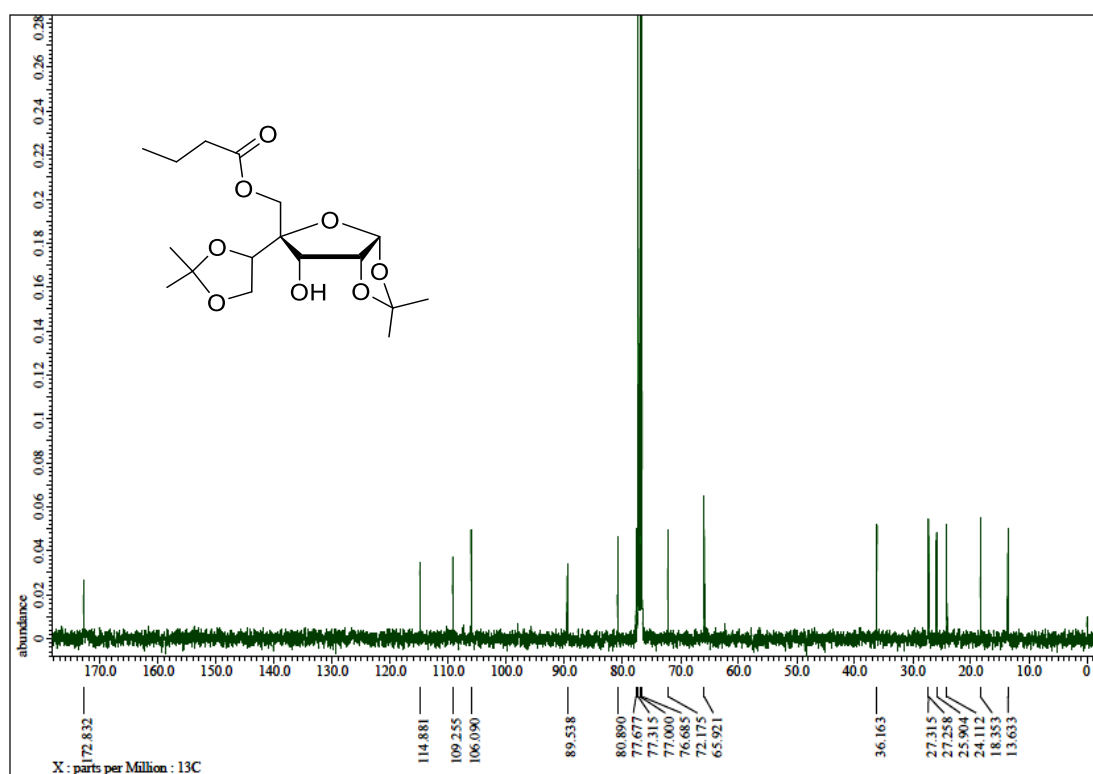

**$^1\text{H}$ - and  $^{13}\text{C}$  NMR Spectra of compound 9 (400 MHz and 100.6 MHz,  $\text{CDCl}_3$ )**

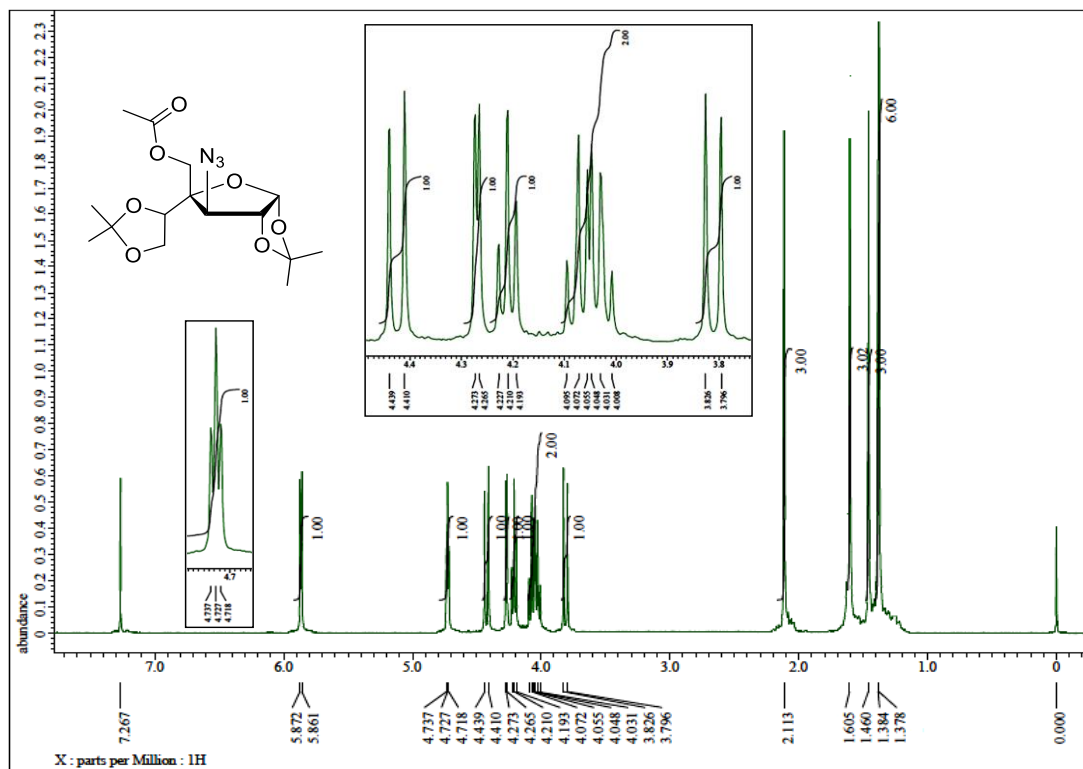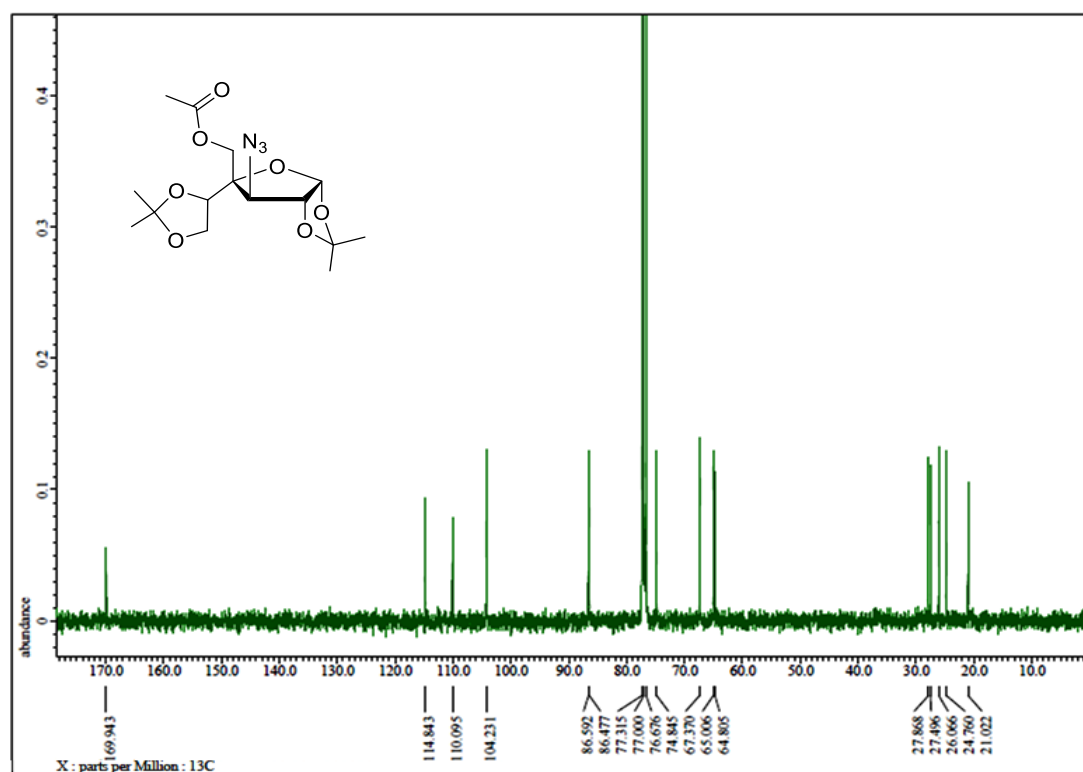

# <sup>1</sup>H- and <sup>13</sup>C NMR Spectra of compound 10 (400 MHz and 100.6 MHz, CDCl<sub>3</sub>)

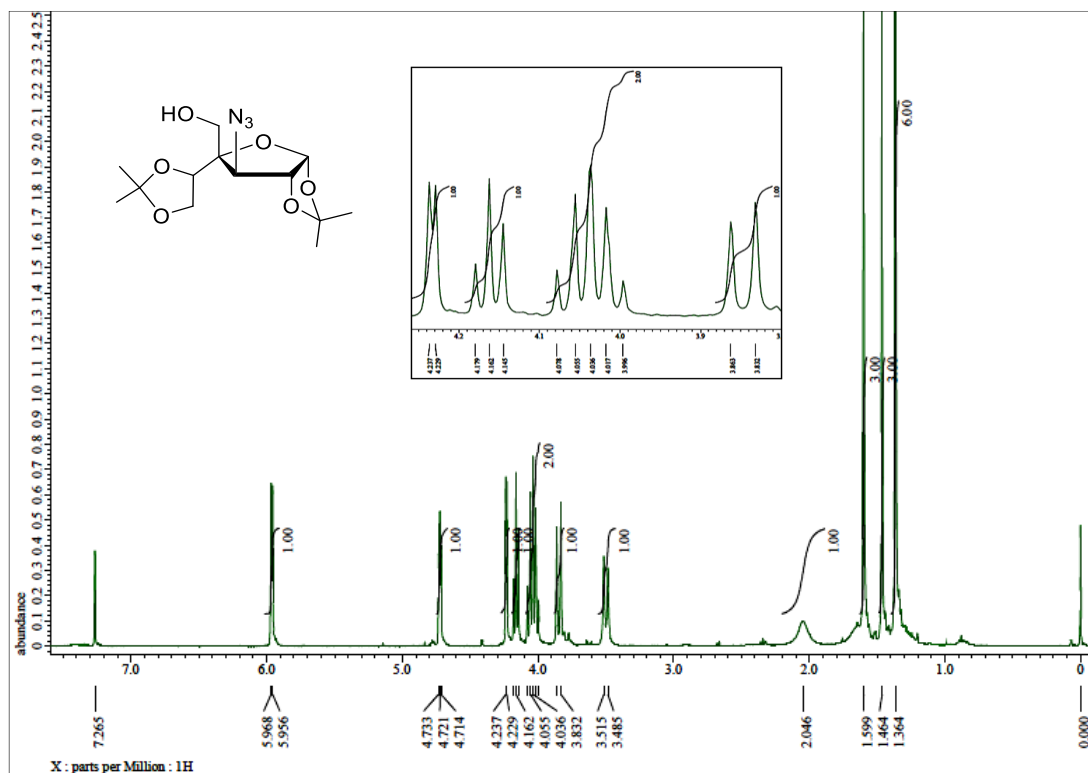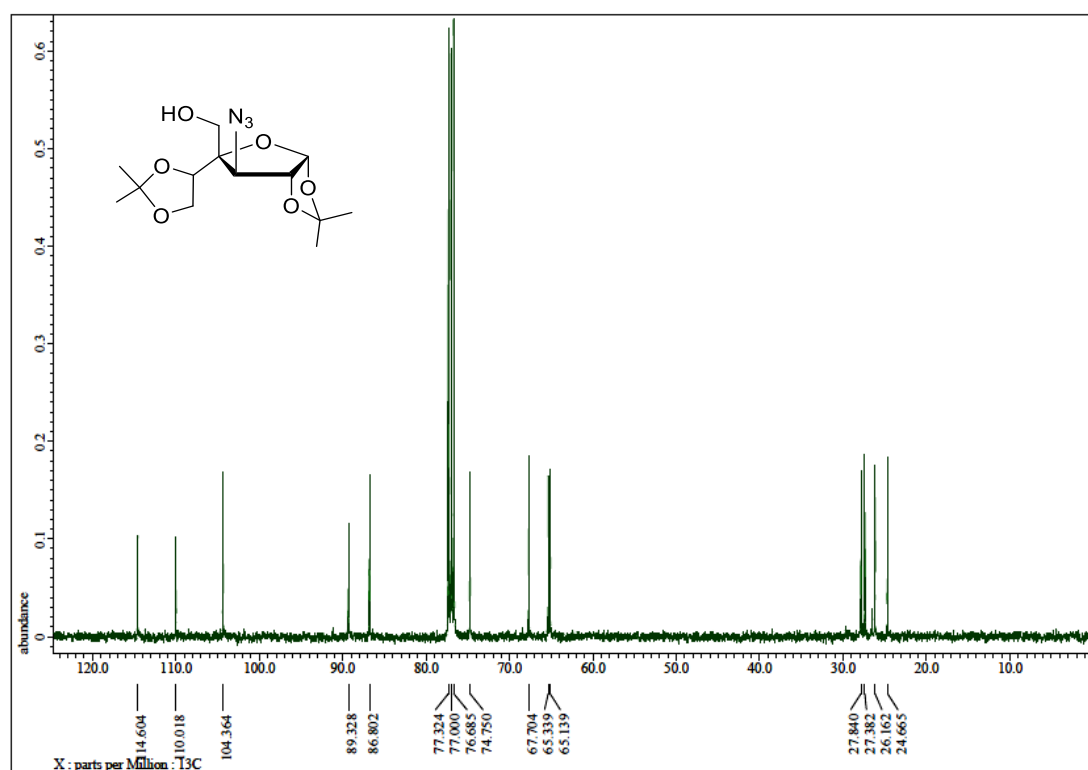

**$^1\text{H}$ - and  $^{13}\text{C}$  NMR Spectra of compound 11 (400 MHz and 100.6 MHz,  $\text{CDCl}_3$ )**

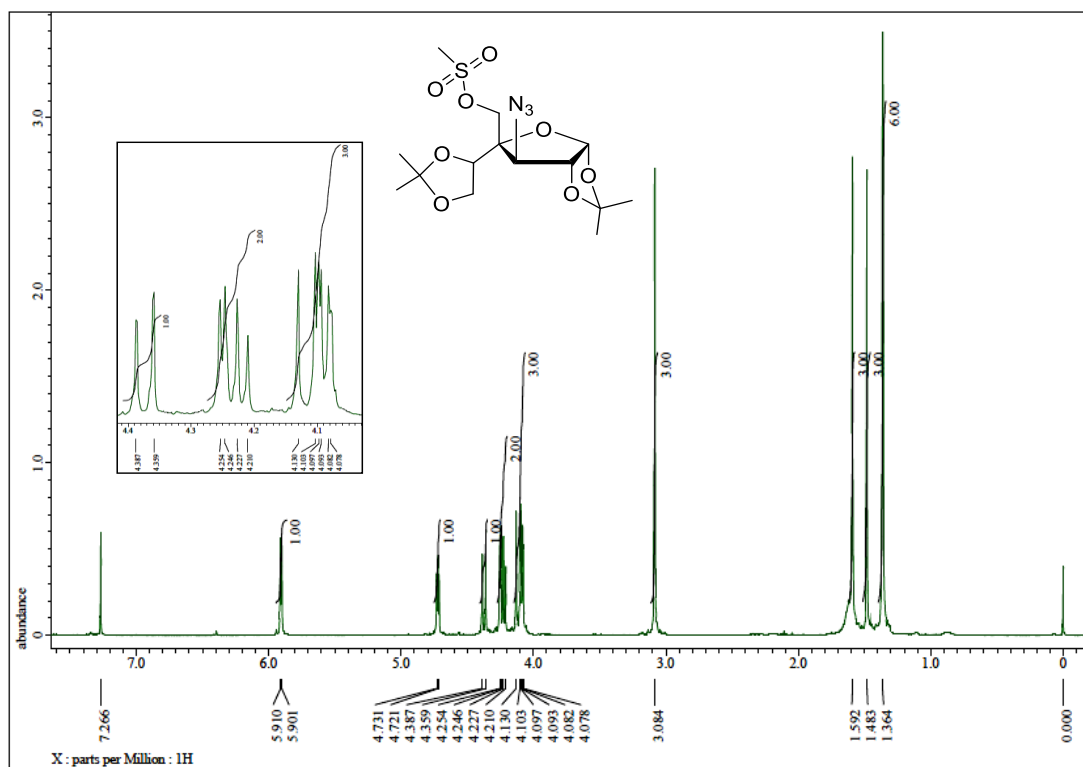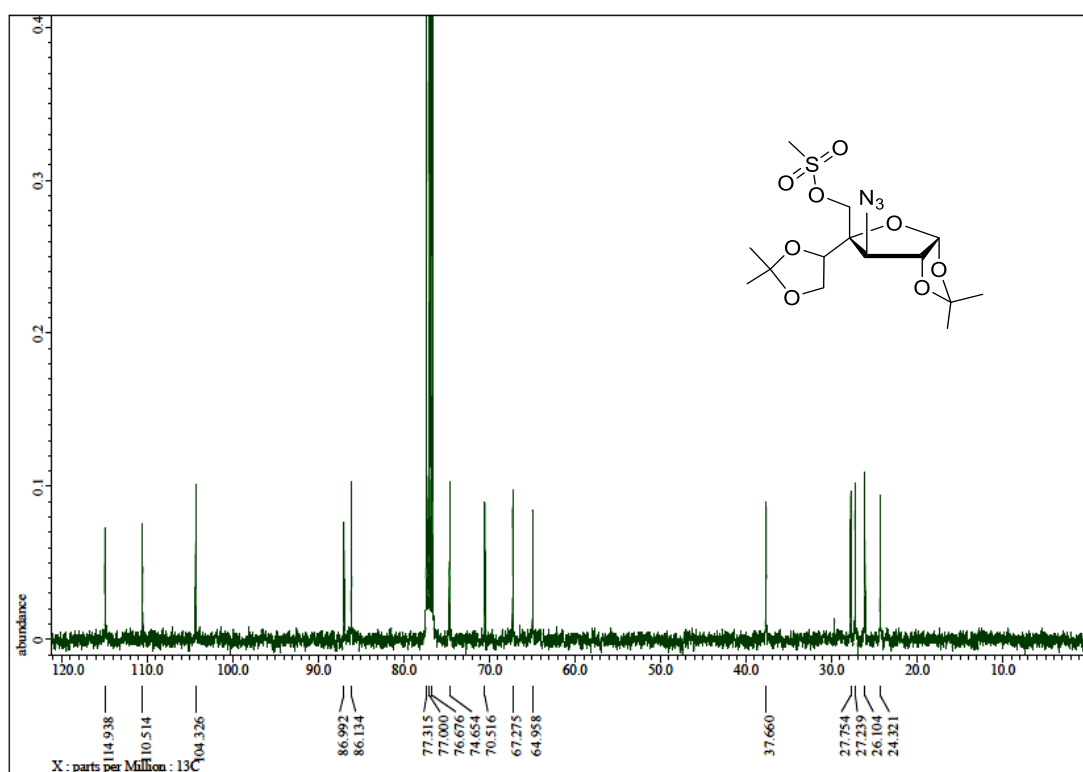



# <sup>1</sup>H- and <sup>13</sup>C NMR Spectra of compound 12a-b (400 MHz and 100.6 MHz, CDCl<sub>3</sub>)

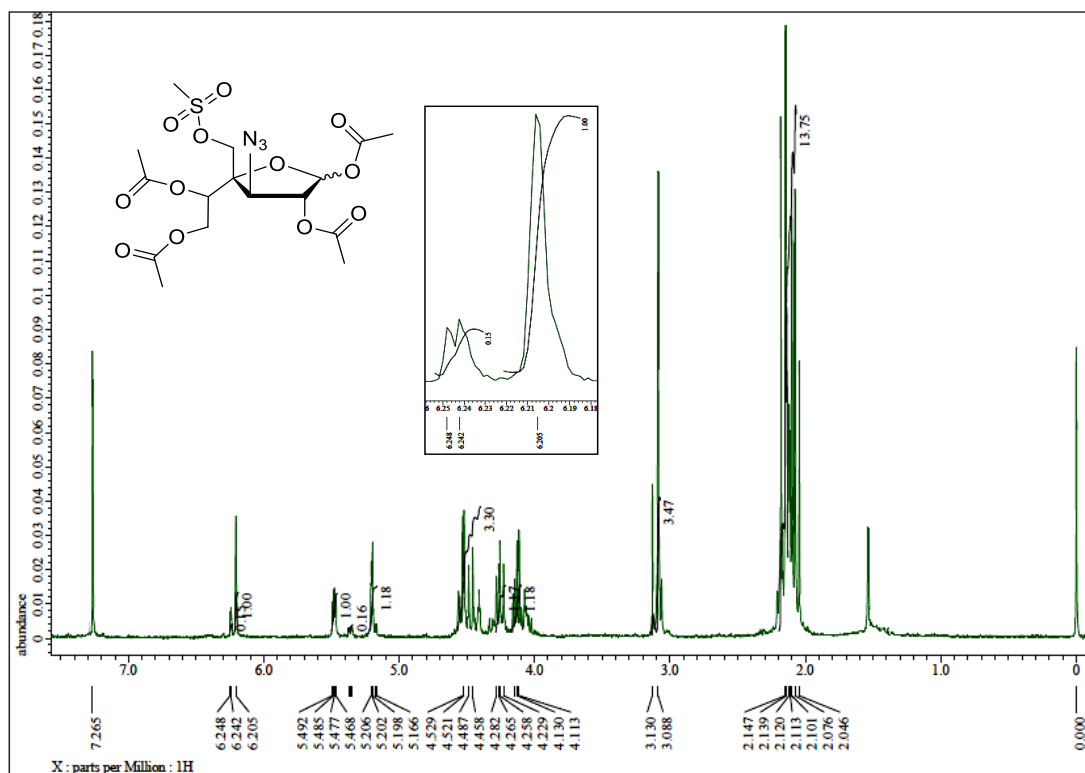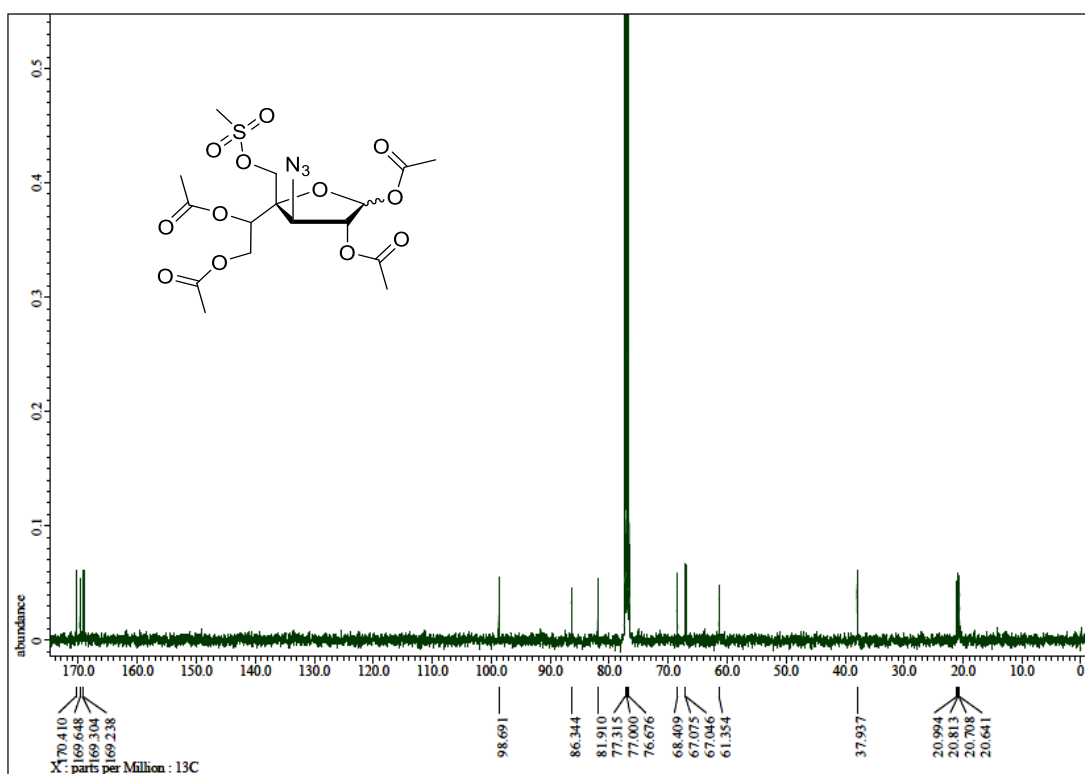

**<sup>1</sup>H- and <sup>13</sup>C NMR Spectra of compound 13a (400 MHz and 100.6 MHz, CDCl<sub>3</sub>)**

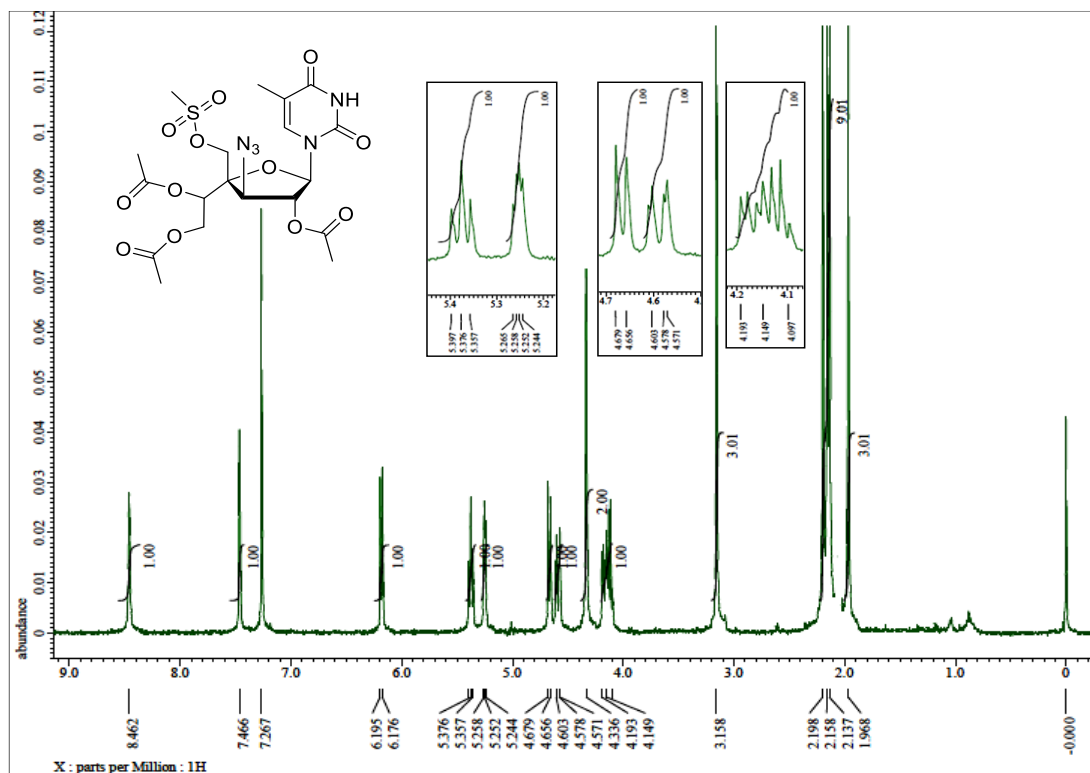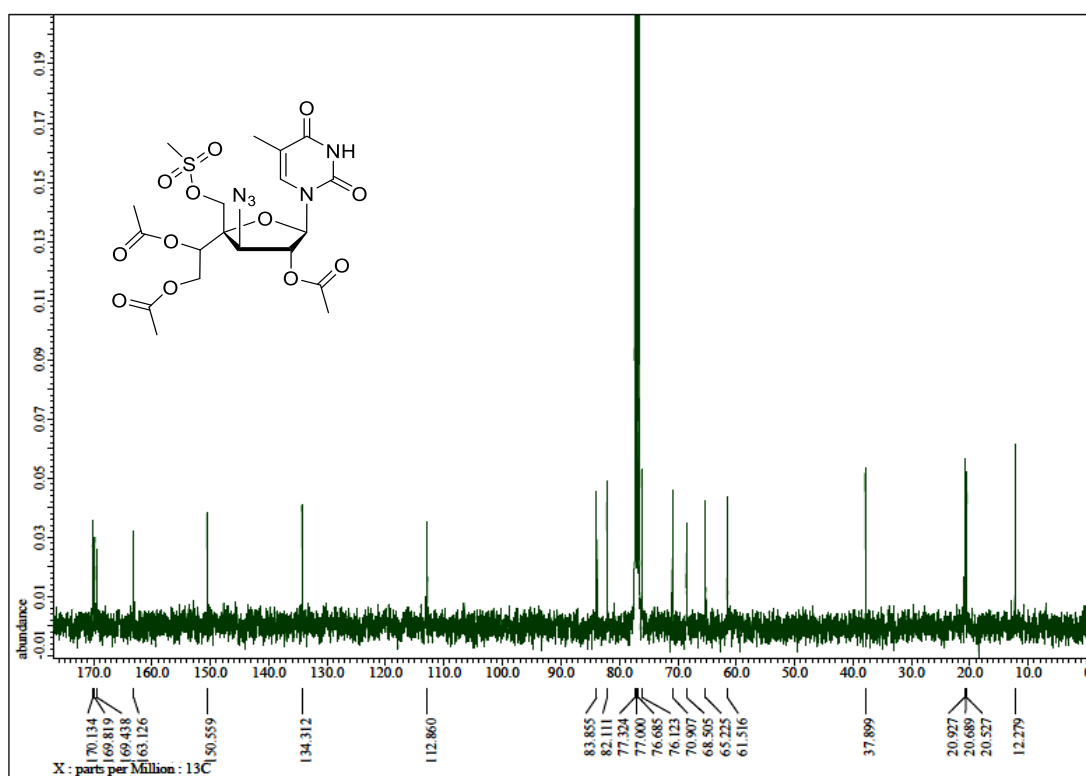

**<sup>1</sup>H- and <sup>13</sup>C NMR Spectra of compound 13b (400 MHz and 100.6 MHz, CDCl<sub>3</sub>)**

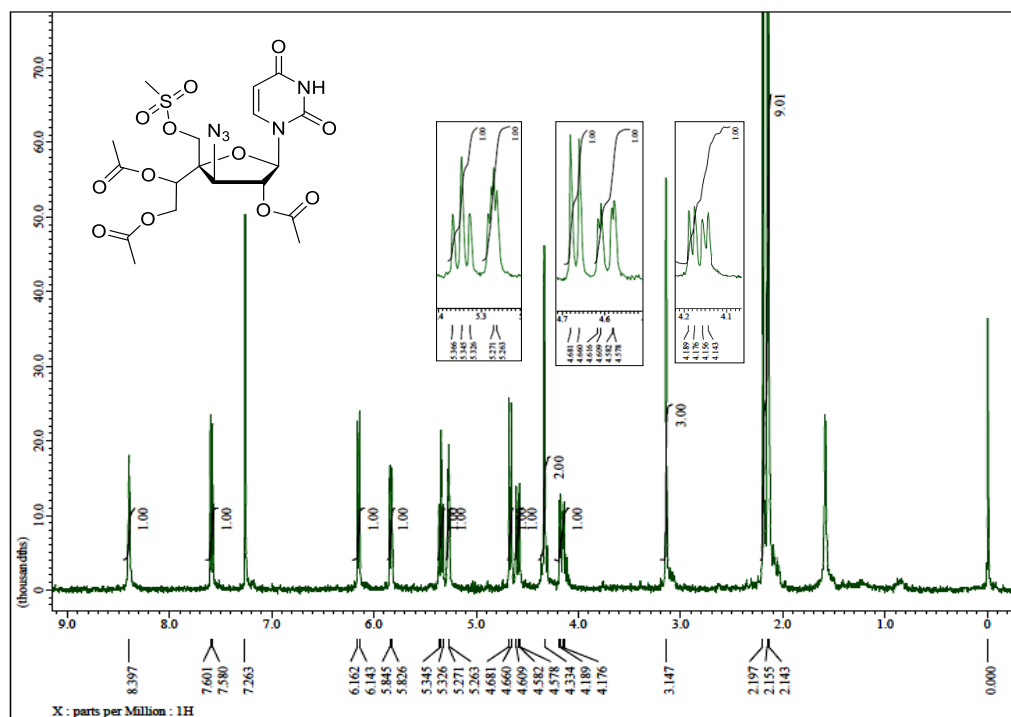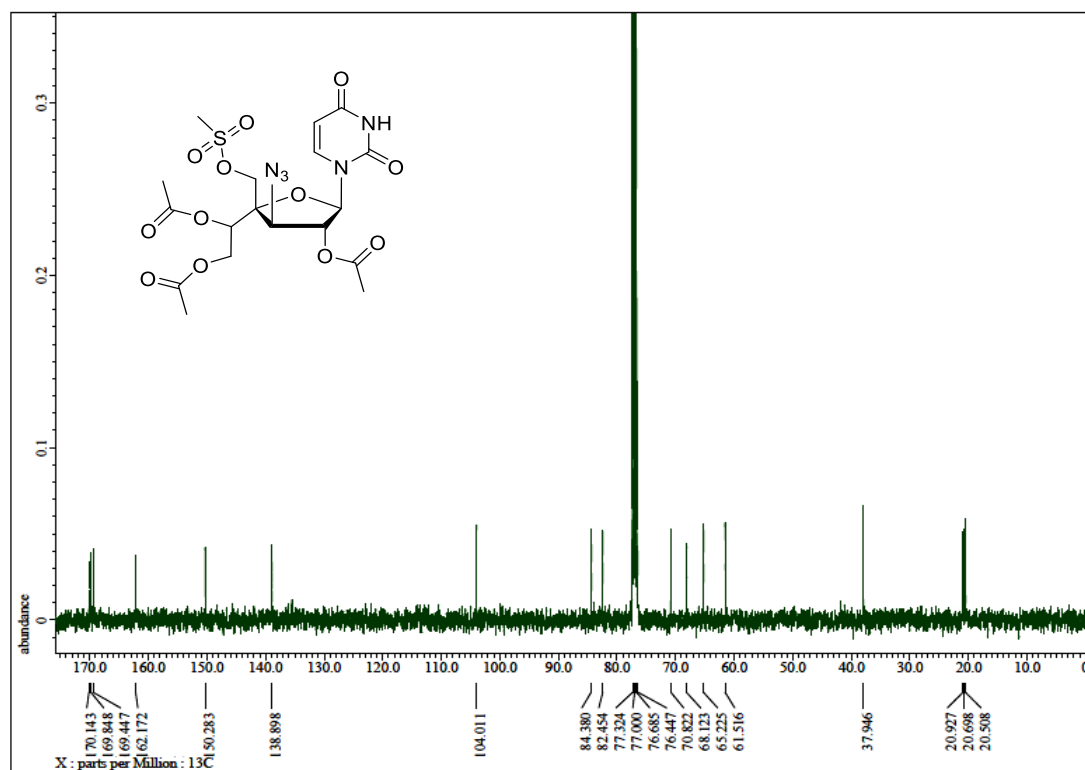

# $^1\text{H}$ - and $^{13}\text{C}$ NMR Spectra of compound 13c (400 MHz and 100.6 MHz, $\text{DMSO-}d_6$ )

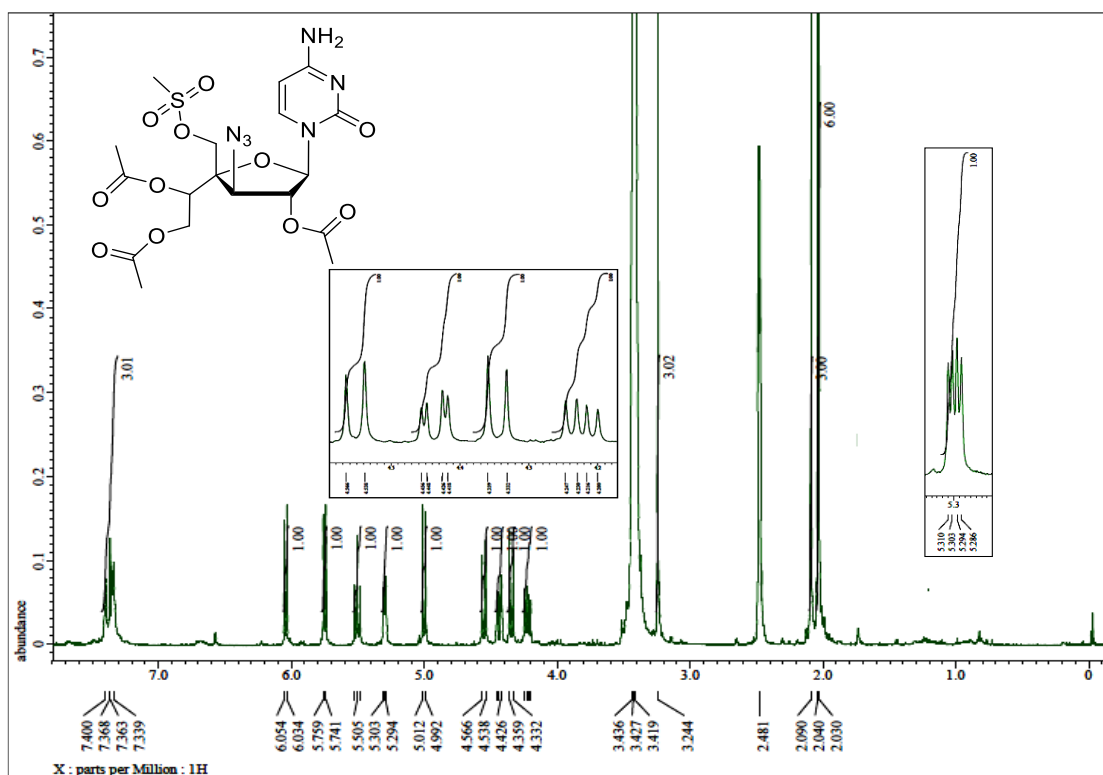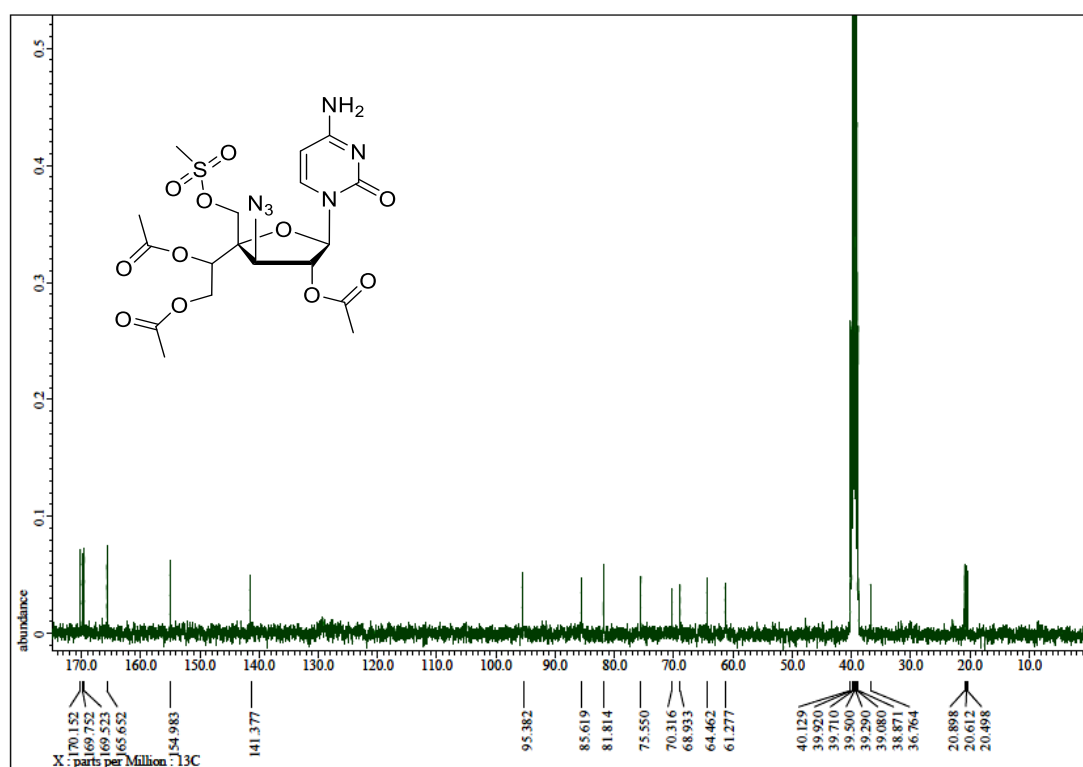

$^1\text{H}$ - $^{13}\text{C}$  HMQC NMR Spectrum of compound 13c (400 MHz,  $\text{DMSO-}d_6$ )

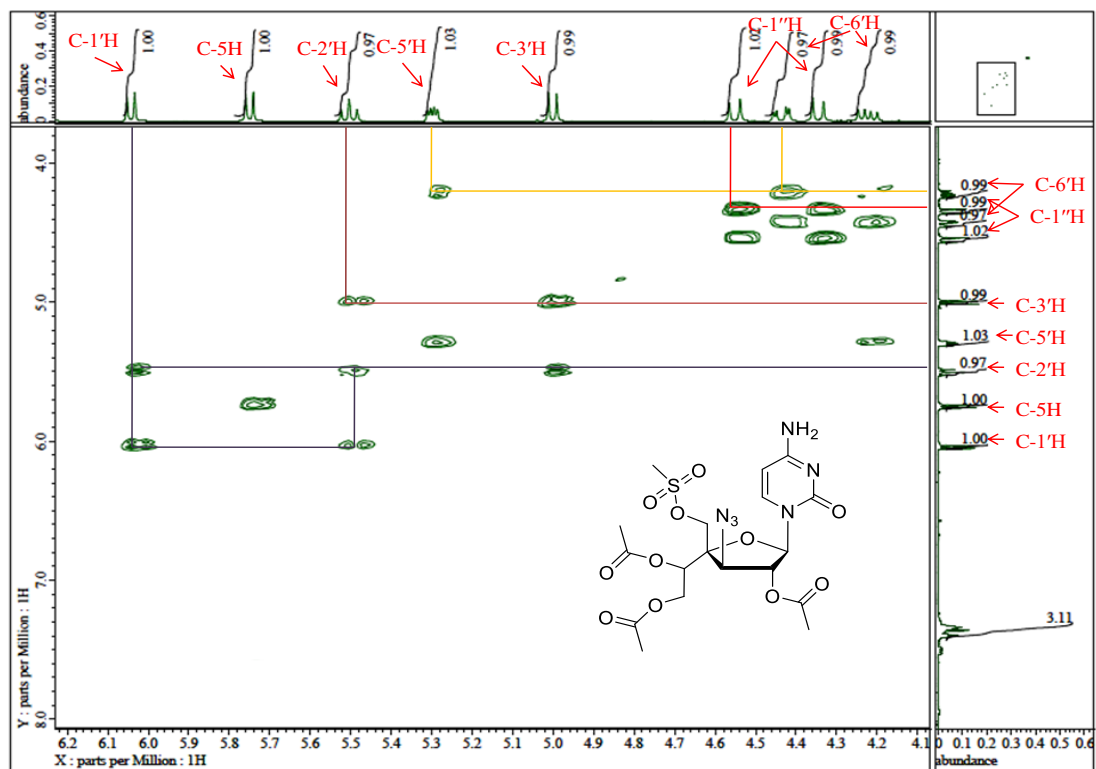

# <sup>1</sup>H- and <sup>13</sup>C NMR Spectra of compound 13d (400 MHz and 100.6 MHz, CDCl<sub>3</sub>)

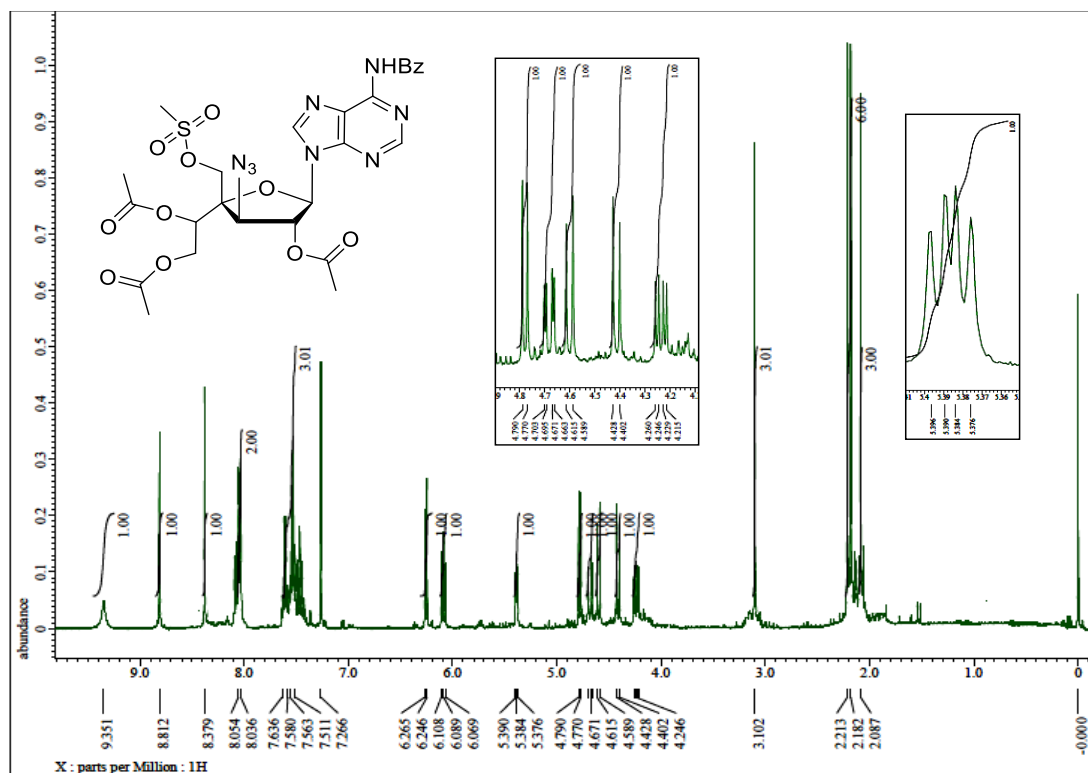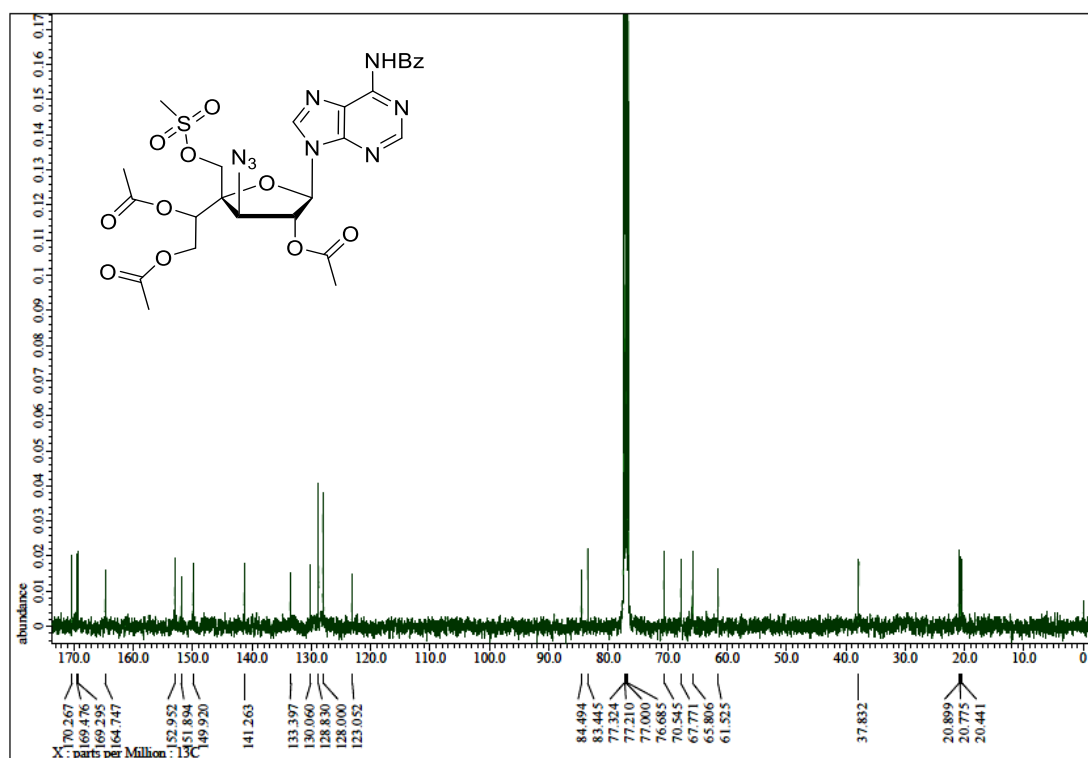

**<sup>1</sup>H- and <sup>13</sup>C NMR Spectra of compound 5a (400 MHz and 100.6 MHz, DMSO-*d*<sub>6</sub>)**

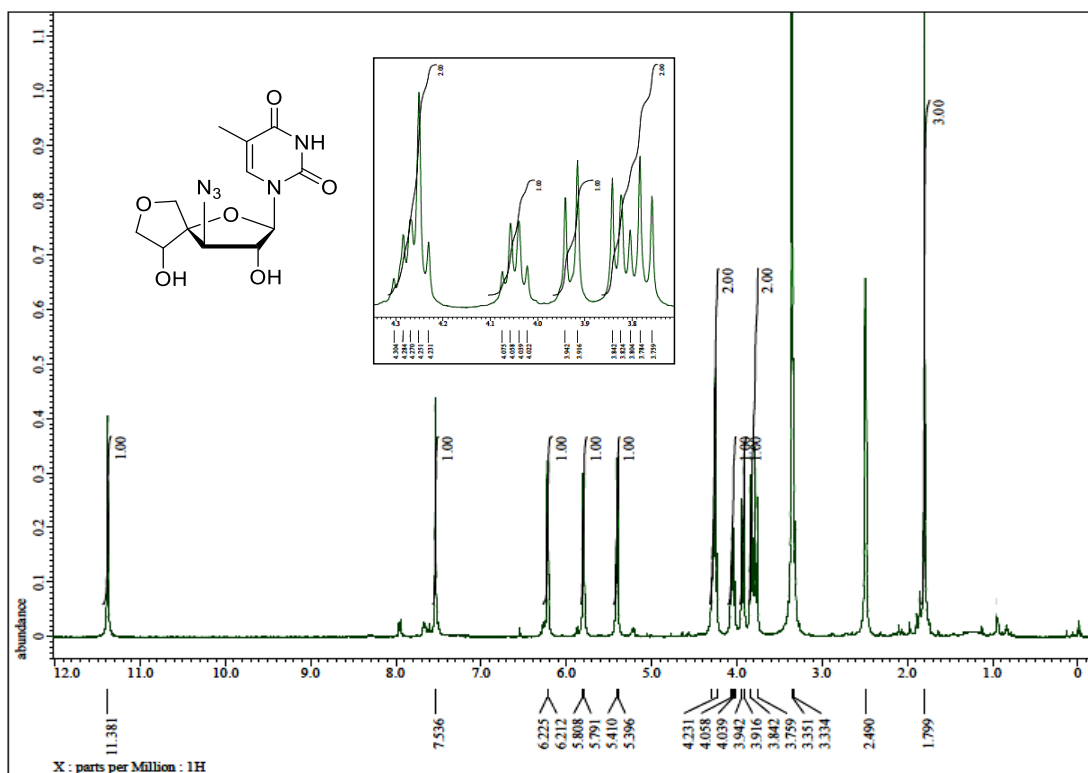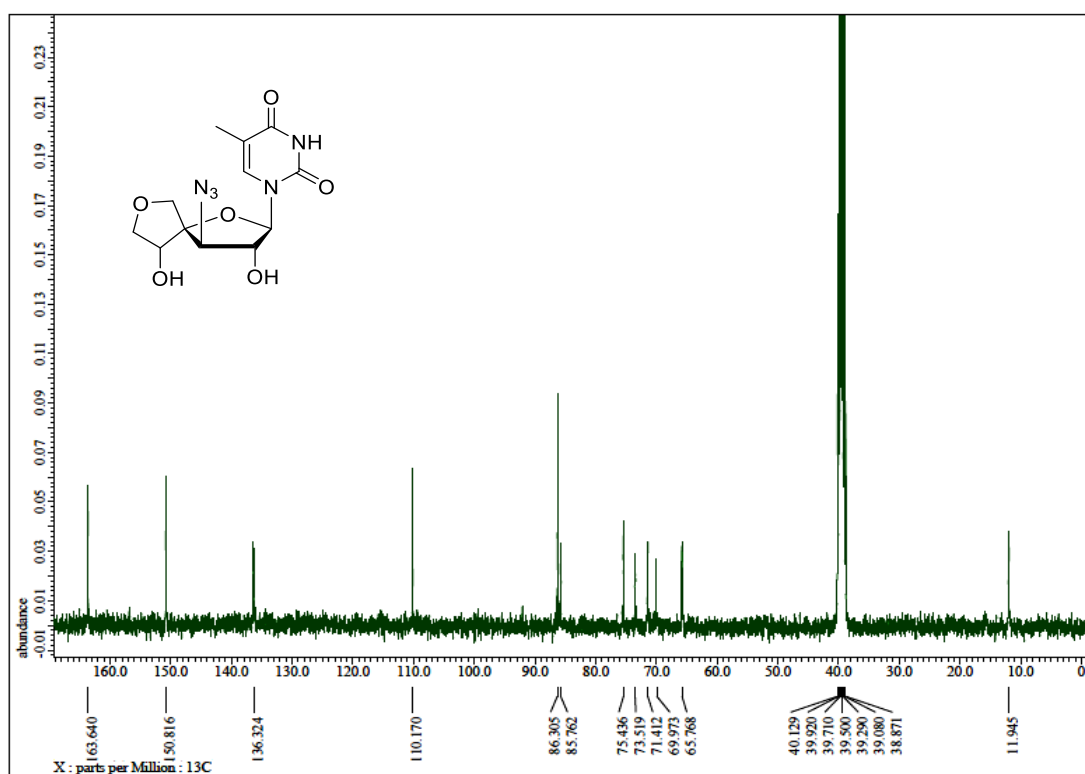

**<sup>1</sup>H- and <sup>13</sup>C NMR Spectra of compound 5b (400 MHz and 100.6 MHz, DMSO-*d*<sub>6</sub>)**

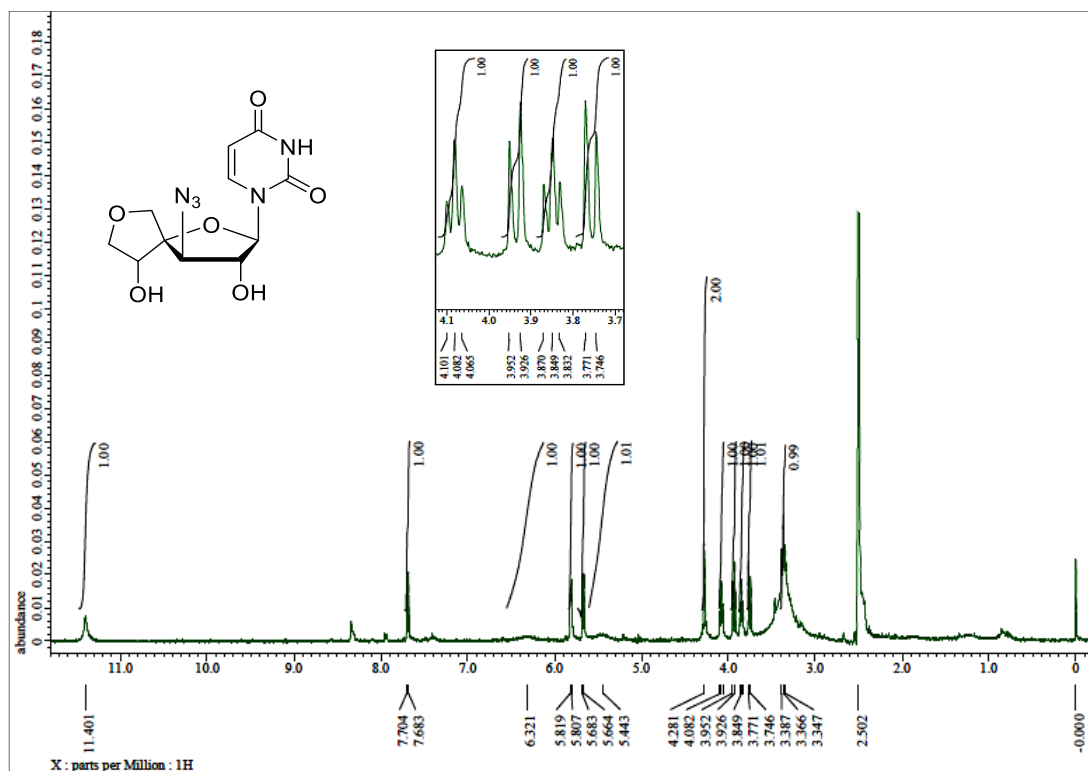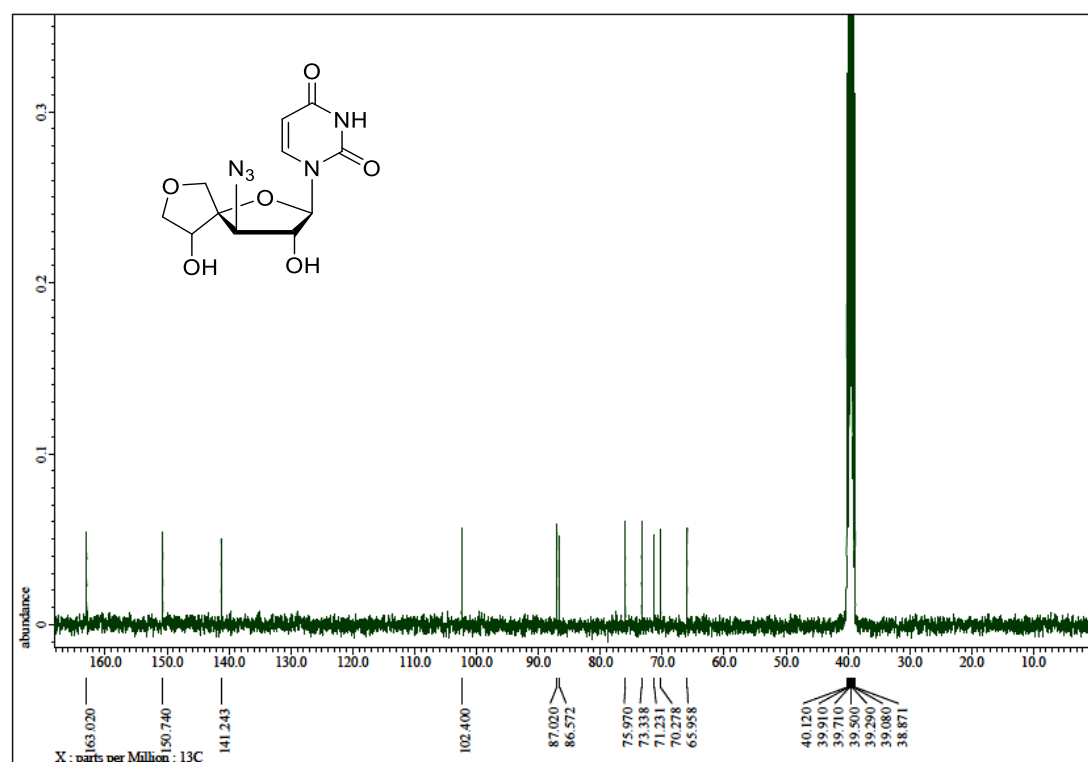



**<sup>1</sup>H- and <sup>13</sup>C NMR Spectra of compound 5c (400 MHz and 100.6 MHz, DMSO-d<sub>6</sub>)**

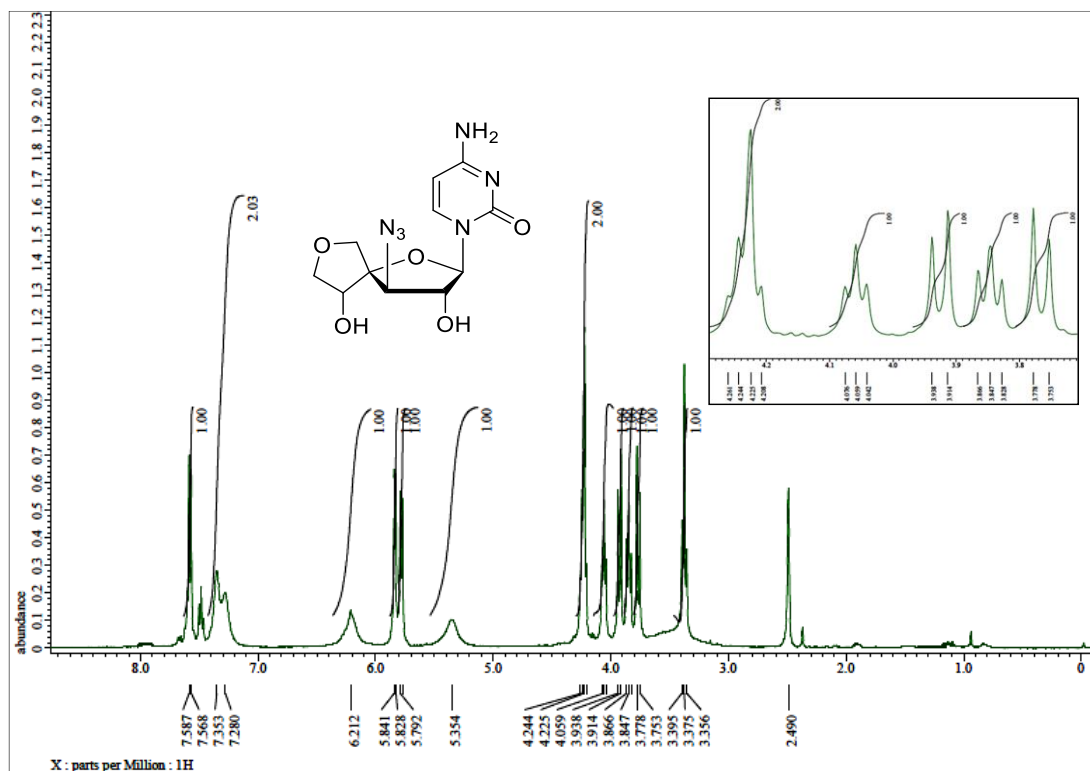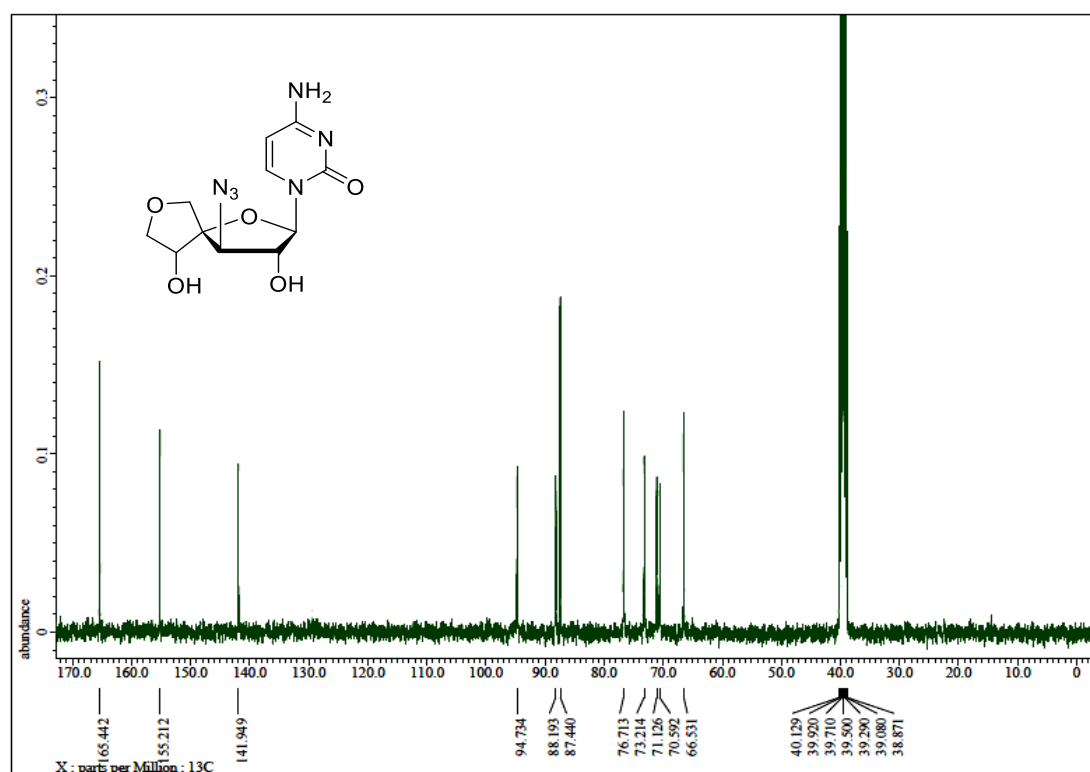

**<sup>1</sup>H- and <sup>13</sup>C NMR Spectra of compound 5d (400 MHz and 100.6 MHz, DMSO-*d*<sub>6</sub>)**

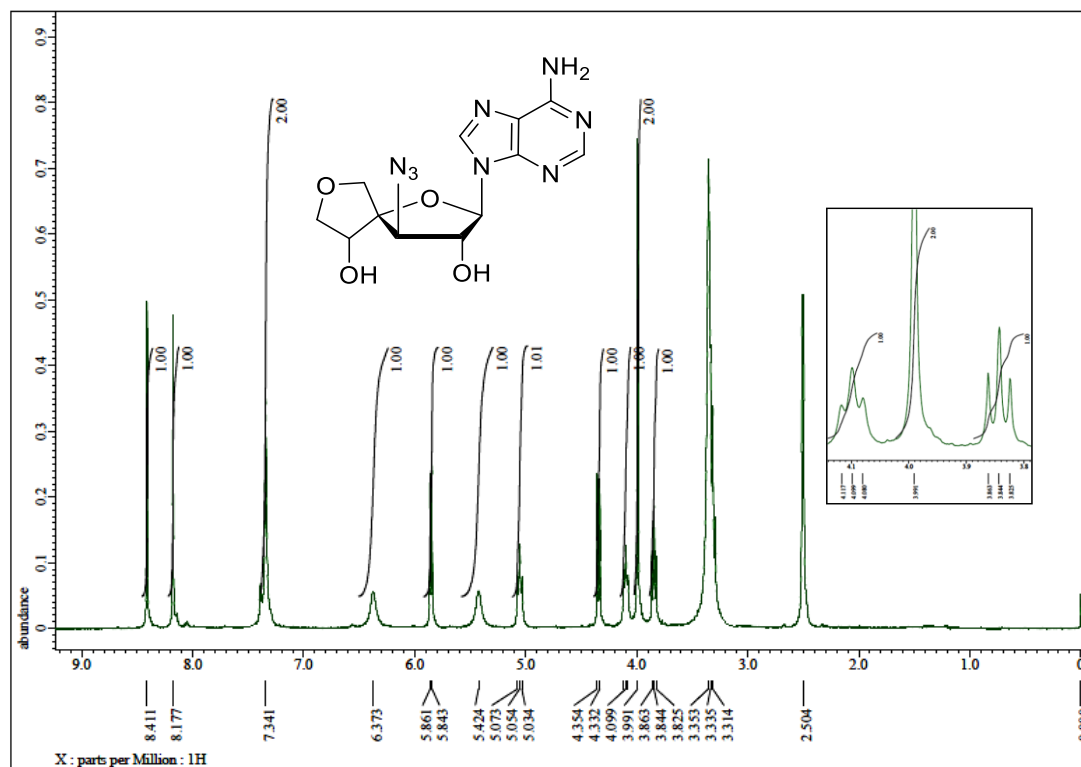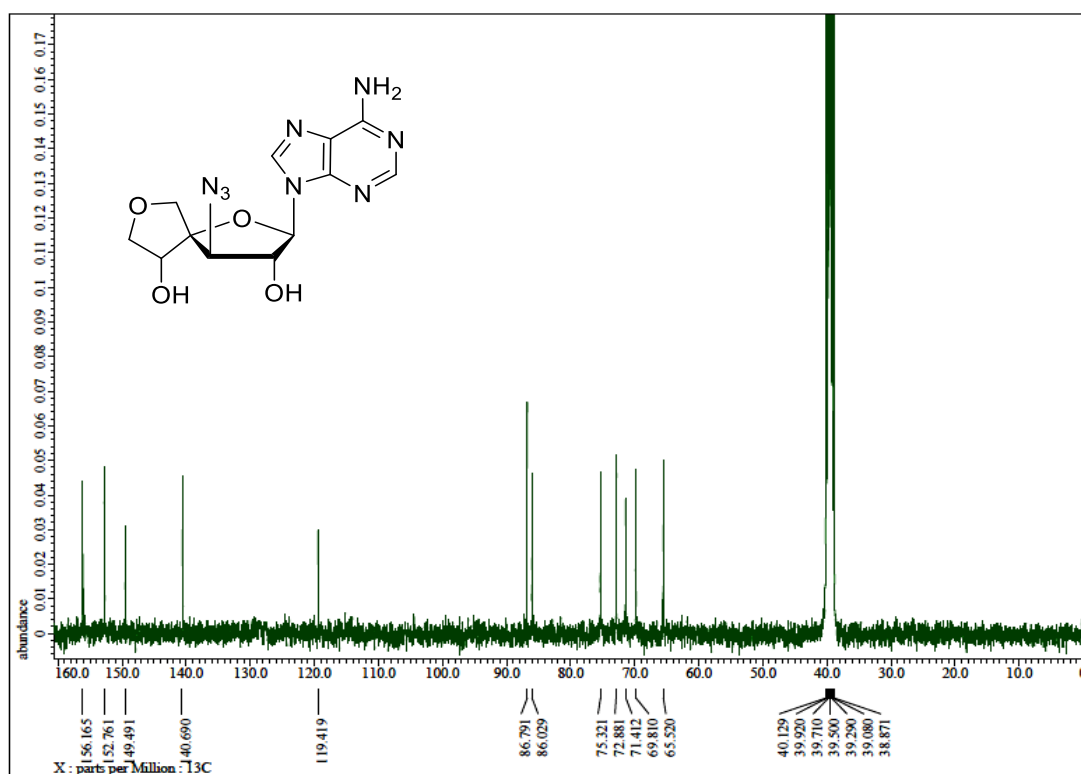

$^1\text{H}$ - $^1\text{H}$  COSY and  $^1\text{H}$ - $^{13}\text{C}$  HMQC NMR Spectra of compound 5d (400 MHz, DMSO- $d_6$ )

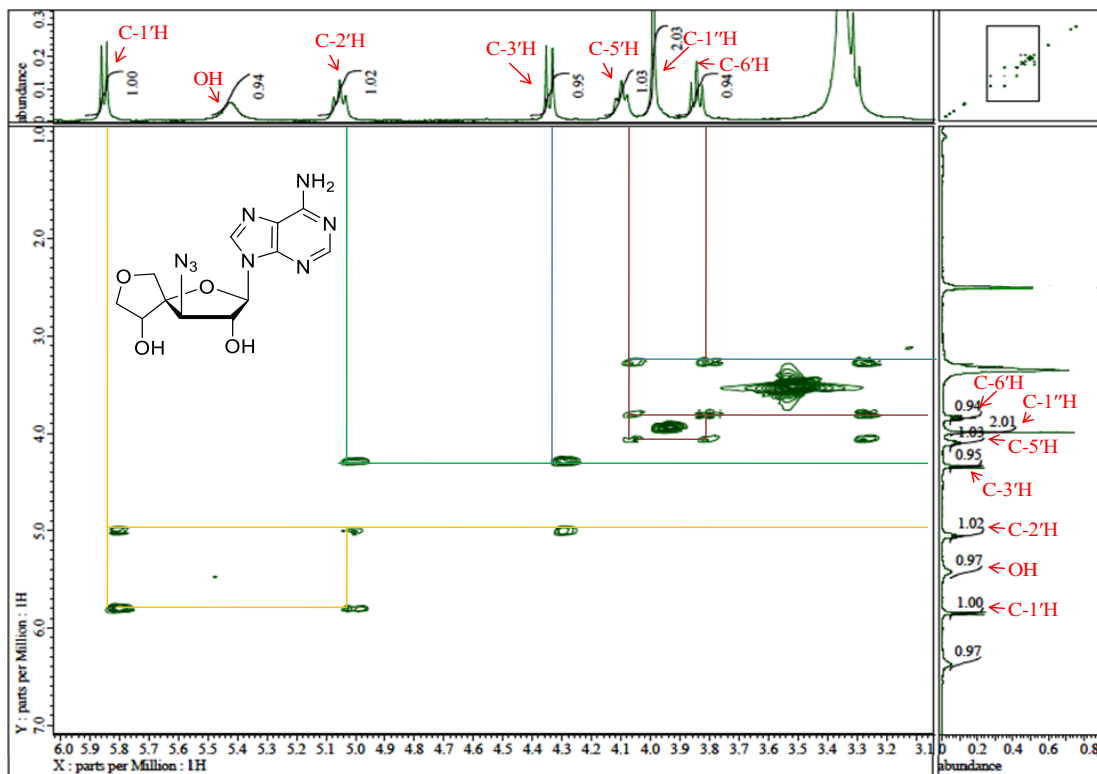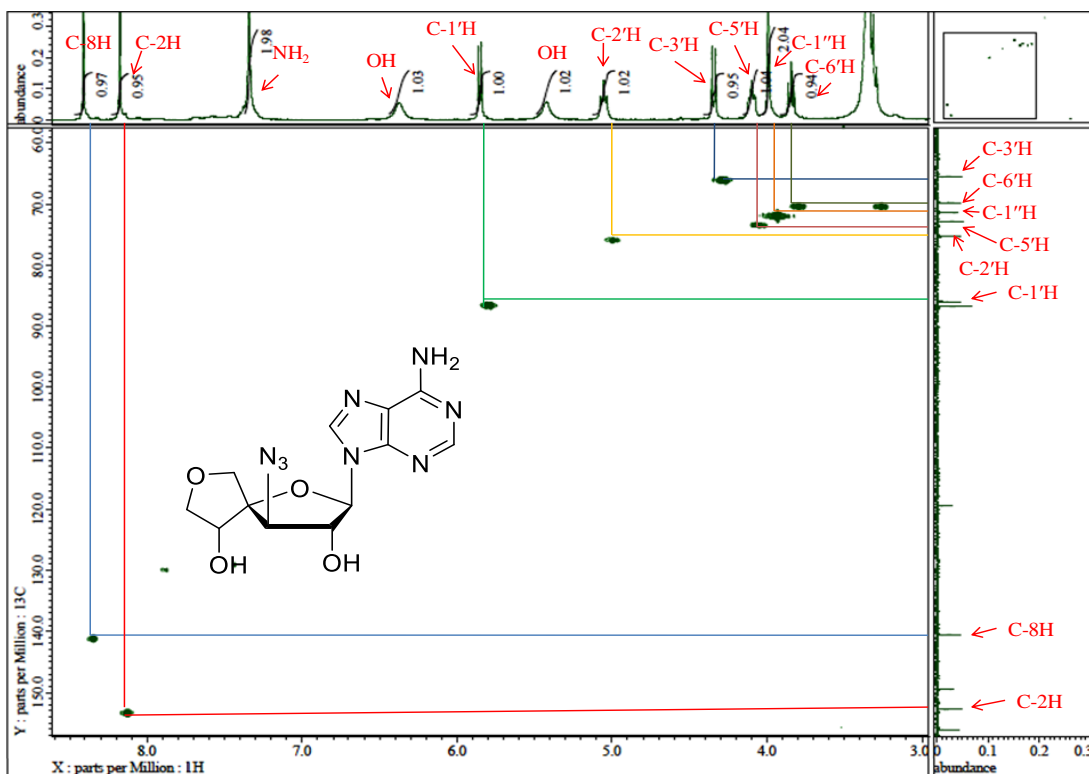

**X-Ray diffraction studies on (1''R)-3'-azido-3'-deoxy,5'-O,4'-C-ethylen-1''-ol-β-D-xylofuranosyl cytosine (5c)**

The molecular structure (1''R)-3'-azido-3'-deoxy,5'-O,4'-C-ethylen-1''-ol-β-D-xylofuranosyl cytosine (**5c**) was drawn as given in Figure 3 using ORTEP and Mercury software. The selected bond lengths, bond angles, etc. are given in Table 1 and other details obtained using PROSIT are mentioned in result and discussion section. CCDC-2004227 contains the supplementary data for this paper. These data can be obtained free of charge *via* <http://www.ccdc.cam.ac.uk/services/structures?access=referee&searchdepnms=2004227&searchauthor=rungta>.
